# Supplementary material for: Magnesium-L-threonate treats Alzheimer’s disease by modulating the microbiota-gut-brain axis
Source: PubMed Central journal article supplement — Neural Regen Res. 2023 Dec 21;19(10):2281–9. doi: 10.4103/1673-5374.391310 (PMC11034594; doi:10.4103/1673-5374.391310), 2023-12-21
Supplement: NRR-19-2281_Suppl1.pdf [file NRR-19-2281_Suppl1.pdf]

|           |            |            |            |            |            |            |             |            |            |            |            |            |            |            |            |             |                                                                                     |                                     |                                     |          |          |          |            |            |           |        |        |            |         |             |            |        |                                                          |    |    |    |    |    |    |    |    |    |    |
|-----------|------------|------------|------------|------------|------------|------------|-------------|------------|------------|------------|------------|------------|------------|------------|------------|-------------|-------------------------------------------------------------------------------------|-------------------------------------|-------------------------------------|----------|----------|----------|------------|------------|-----------|--------|--------|------------|---------|-------------|------------|--------|----------------------------------------------------------|----|----|----|----|----|----|----|----|----|----|
| MW0111075 | 4573.31676 | 5705.0455  | 5024.09486 | 4903.53648 | 4678.72489 | 4399.43893 | 4275.82568  | 5836.37379 | 4895.69633 | 4693.66653 | 4721.74548 | 4625.54506 | 4763.13496 | 4458.85484 | 5037.70172 | C4H11NO3    | Trometamol                                                                          | Alcohol and amines                  | Alcohols                            | 120.6645 | 121.0739 | 0.7802   | M-H        | 0.26675    | MSI       | 0.7434 | rp     | 77.86-1    | 6503    | HMDB006248  | -          | C07182 | --                                                       | -- | -- | -- | -- | -- |    |    |    |    |    |
| MW0111124 | 12201.349  | 954.25189  | 1082.9893  | 451.57463  | 813.149153 | 1409.08336 | 4155.78147  | 1318.21599 | 1588.9022  | 1755.20988 | 1158.70999 | 1644.35173 | 1453.43879 | 1147.01454 | 1402.3582  | CRH11NO3    | N,N-Dimethyl-2-thiopyridinamine                                                     | Alcohol and amines                  | Amines                              | 250.0382 | 169.9561 | 1.2202   | M-CI+HCOOH | 2.16325    | MSI       | 0.6997 | rp     | 51948-20   | 2408995 | HMDB001111  | -          | C02846 | --                                                       | -- | -- | -- | -- | -- |    |    |    |    |    |
| MW0111174 | 51452.9767 | 3173.468   | 4252.8582  | 2853.75017 | 8487.11121 | 8006.54141 | 4989.52725  | 3299.99001 | 4839.1318  | 3682.57428 | 6383.6668  | 438.50426  | 1996.14887 | 9807.89966 | 3663.92478 | 12607.6099  | C3H4O3                                                                              | Benzene and substituted derivatives | Alcohol and amines                  | Alcohols | 218.2713 | 121.6819 | 7.8302     | M-K        | 1.9174719 | MSI    | 0.8508 | rp         | 121.697 | 949         | HMDB001020 | 64944  | C02846                                                   | -- | -- | -- | -- | -- | -- |    |    |    |    |
| MW0111225 | 176.64124  | 388.865441 | 259.150676 | 360.574886 | 190.959135 | 262.449219 | 361.686115  | 375.092545 | 494.381371 | 561.5412   | 236.977473 | 439.90122  | 411.497625 | 261.844253 | 348.300403 | C2H6N2O     | N-Tirosyldimethylamine                                                              | Alcohol and amines                  | Amines                              | 82.9993  | 74.048   | 1.2      | 2M-Na+K    | 3.9679     | MSI       | 0.66   | rp     | 62-75.9    | 6124    | HMDB0031419 | -          | C14704 | ko05204                                                  | -- | -- | -- | -- | -- | -- |    |    |    |    |
| MW0111256 | 15646.3469 | 15497.78   | 14896.3696 | 146418.818 | 15196.5516 | 14807.1404 | 15997.5648  | 15108.8824 | 15173.9524 | 14255.842  | 15648.8834 | 14720.8719 | 15298.3039 | 1255.2923  | 1341.0581  | C5H11NO4P   | Phosphocholine                                                                      | Organic acid And Its derivatives    | Phosphoric acids                    | 184.0746 | 184.0739 | 8.6195   | M-H        | 3.75811299 | MSI       | 0.8919 | rp     | 107-73.3   | 1014    | HMDB001565  | -          | C05888 | ko00564.ko01100.ko05231                                  | -- | -- | -- | -- | -- | -- | -- |    |    |    |
| MW0111332 | 338.123407 | 110.47481  | 142.93461  | 111.34766  | 112.124    | 111.34766  | 112.124     | 111.34766  | 112.124    | 111.34766  | 112.124    | 111.34766  | 112.124    | 111.34766  | 112.124    | C11H19NO2S  | 4-Amino-2-ethylamino-1,3-thiazol-5-yl-(4-chlorophenyl)methane                       | Aldehyde,Ketones,Esters             | Ketones                             | 208.0348 | 281.039  | 2.4502   | M-H        | 3.7885     | MSI       | 0.8891 | rp     | 102-71.6   | 7638    | HMDB003238  | -          | C06771 | ko0564                                                   | -- | -- | -- | -- | -- | -- |    |    |    |    |
| MW0111876 | 12043.4888 | 9176.63501 | 13024.546  | 11679.099  | 12696.6469 | 14983.2344 | 14526.1933  | 15600.9409 | 11815.7546 | 13182.7416 | 10888.6322 | 12979.0251 | 14538.3297 | 15155.582  | 14590.6728 | C15H19BNOS2 | 2-(1,3-Benzothiazol-2-ylsulfanyl)-1-(4-chlorophenyl)ethane                          | Benzene and substituted derivatives | Benzene and substituted derivatives | 363.2939 | 364.9366 | 6.8039   | M-H        | 14.065     | MSI       | 0.7475 | rp     | 23384-65.8 | 990128  | -           | -          | -      | -                                                        | -  | -  | -  | -  | -  | -  |    |    |    |    |
| MW0111890 | 956.761322 | 1443.30684 | 1075.81539 | 1372.189   | 639.862833 | 561.388206 | 565.584741  | 568.753476 | 155.814222 | 1536.00275 | 74.4166191 | 416.49172  | 721.650774 | 904.957329 | 393.85782  | C5H13NO2    | 2,2-Dimethoxyethoxyethane                                                           | Alcohol and amines                  | Amines                              | 120.1032 | 119.0946 | 11.6812  | M-H        | 5.92825    | MSI       | 0.6217 | rp     | 31576-51.9 | 520530  | -           | -          | -      | -                                                        | -  | -  | -  | -  | -  | -  |    |    |    |    |
| MW0111910 | 17006.2607 | 18118.321  | 21372.3234 | 26357.3273 | 28434.71   | 31736.544  | 36244.4874  | 45886.945  | 21065.3882 | 25906.0154 | 28459.2948 | 32376.6248 | 34354.1478 | 35148.1006 | 35148.1006 | C10H16O6    | 2,3,4,5-Tetrahydroxyphenytoic acid                                                  | Organic acid And Its derivatives    | Organic acid And Its derivatives    | 149.0087 | 166.4477 | 6.8039   | M-H+CH4    | 0.65475    | MSI       | 0.9839 | rp     | -          | -       | -           | -          | -      | -                                                        | -  | -  | -  | -  | -  | -  |    |    |    |    |
| MW0111943 | 62103.8899 | 2511.5939  | 2266611.14 | 22517597.7 | 20683180.9 | 22565622.6 | 22211032.4  | 22485076.7 | 21272539   | 21784.494  | 19885907.5 | 22046640   | 2425.4447  | 2131201.7  | 22139737.2 | C4H6O2      | 2,3-Butanedione                                                                     | Aldehyde,Ketones,Esters             | Ketones                             | 125.0012 | 86.0368  | 9.7246   | M-K        | 3.198675   | MSI       | 0.6761 | rp     | 431-03.8   | 650     | HMDB003040  | -          | C00741 | ko0660                                                   | -- | -- | -- | -- | -- | -- | -- |    |    |    |
| MW0111948 | 25689.162  | 30972.6778 | 33015.817  | 29851.6173 | 29831.1697 | 29323.114  | 31325.390   | 37079.4683 | 28523.5193 | 33015.817  | 29586.5092 | 32405.6271 | 34925.9978 | 3196.924   | 3496.1998  | C4H6O6      | 2,3-Dihydroxybutanedioic acid                                                       | Organic acid And Its derivatives    | Organic acid And Its derivatives    | 149.0088 | 150.0688 | 4.3728   | M-H        | 2.29414989 | MSI       | 0.7605 | rp     | 133-37.9   | 85      | HMDB0093167 | -          | C02650 | --                                                       | -- | -- | -- | -- | -- | -- | -- | -- |    |    |
| MW0112231 | 604.31185  | 5627.8087  | 5286.25599 | 634.07733  | 5263.51038 | 5199.44004 | 5021.8122   | 4946.83152 | 4836.17649 | 5389.98704 | 4606.3131  | 4835.59805 | 4736.45413 | 4738.30614 | 4615.7053  | C3H7O7P     | 2-Phosphoglyceric acid                                                              | Organic acid And Its derivatives    | Organic acid And Its derivatives    | 186.9995 | 185.9929 | 12.134   | M-H        | 7.34925    | MSI       | 0.8462 | rp     | 600-18.0   | 59      | HMDB002005  | -          | C00109 | ko00260.ko00270.ko00290.ko00640.ko01100.ko041720.ko01230 | -- | -- | -- | -- | -- | -- | -- | -- | -- | -- |
| MW0112337 | 151678.317 | 145356.111 | 13682.174  | 14582.979  | 113669.979 | 121469.67  | 66465.611   | 117566.401 | 6005.36914 | 117566.401 | 6005.36914 | 117566.401 | 6005.36914 | 117566.401 | 6005.36914 | C11H19NO2   | 4-Amino-2-ethylamino-1,3-thiazol-5-yl-(4-chlorophenyl)methane                       | Aldehyde,Ketones,Esters             | Ketones                             | 217.0628 | 224.117  | 5.6089   | M-K+H2O    | 15.8131395 | MSI       | 0.6625 | rp     | 102-71.6   | 7638    | HMDB006202  | -          | C01412 | ko00564.ko01100.ko05231                                  | -- | -- | -- | -- | -- | -- | -- | -- |    |    |
| MW0112836 | 21030.7834 | 13594.8371 | 1409.4753  | 16131.7348 | 22899.7692 | 15528.9349 | 21253.8783  | 12533.0215 | 32336.3039 | 15148.0475 | 13652.9974 | 18980.723  | 16394.0719 | 15844.2667 | 19661.9495 | C7H6O2      | 3-Hydroxybenzaldehyde                                                               | Benzene and substituted derivatives | Benzene and substituted derivatives | 121.0292 | 122.0368 | 4.5606   | M-H        | 1.94875    | MSI       | 0.9536 | rp     | 100-83.4   | 101     | -           | -          | -      | -                                                        | -  | -  | -  | -  | -  | -  | -  |    |    |    |
| MW0112868 | 3885.8271  | 3650.7514  | 3220.3428  | 3788.31216 | 3863.60804 | 3907.72446 | 3371.80089  | 3307.80024 | 3745.80742 | 4264.79346 | 4360.264   | 4394.00896 | 4354.19797 | 3922.02688 | 4028.4677  | C5H10O      | 3-Methyl-2-buten-1-ol                                                               | Alcohol and amines                  | Alcohols                            | 104.1084 | 86.0732  | 12.134   | M+NH4      | 3.2765239  | MSI       | 0.6364 | rp     | 556-82.1   | 11373   | HMDB0030124 | -          | C01390 | --                                                       | -- | -- | -- | -- | -- | -- | -- | -- |    |    |
| MW0113123 | 1621.74555 | 4622.4582  | 2853.75017 | 8487.11121 | 8006.54141 | 4989.52725 | 3299.99001  | 4839.1318  | 3682.57428 | 6383.6668  | 438.50426  | 1996.14887 | 9807.89966 | 3663.92478 | 12607.6099 | C3H4O3      | 2,2-Dimethoxyethoxyethane                                                           | Organic acid And Its derivatives    | Organic acid And Its derivatives    | 120.1032 | 119.0946 | 11.6812  | M-H        | 5.92825    | MSI       | 0.6217 | rp     | 31576-51.9 | 520530  | -           | -          | -      | -                                                        | -  | -  | -  | -  | -  | -  |    |    |    |    |
| MW0113190 | 17006.2607 | 18118.321  | 21372.3234 | 26357.3273 | 28434.71   | 31736.544  | 36244.4874  | 45886.945  | 21065.3882 | 25906.0154 | 28459.2948 | 32376.6248 | 34354.1478 | 35148.1006 | 35148.1006 | C10H16O6    | 2,3,4,5-Tetrahydroxyphenytoic acid                                                  | Organic acid And Its derivatives    | Organic acid And Its derivatives    | 149.0087 | 166.4477 | 6.8039   | M-H+CH4    | 0.65475    | MSI       | 0.9839 | rp     | -          | -       | -           | -          | -      | -                                                        | -  | -  | -  | -  | -  | -  |    |    |    |    |
| MW0113928 | 62103.8899 | 2511.5939  | 2266611.14 | 22517597.7 | 20683180.9 | 22565622.6 | 22211032.4  | 22485076.7 | 21272539   | 21784.494  | 19885907.5 | 22046640   | 2425.4447  | 2131201.7  | 22139737.2 | C4H6O2      | 2,3-Butanedione                                                                     | Aldehyde,Ketones,Esters             | Ketones                             | 125.0012 | 86.0368  | 9.7246   | M-K        | 3.198675   | MSI       | 0.6761 | rp     | 431-03.8   | 650     | HMDB003040  | -          | C00741 | ko0660                                                   | -- | -- | -- | -- | -- | -- | -- | -- |    |    |
| MW0113943 | 25689.162  | 30972.6778 | 33015.817  | 29851.6173 | 29831.1697 | 29323.114  | 31325.390   | 37079.4683 | 28523.5193 | 33015.817  | 29586.5092 | 32405.6271 | 34925.9978 | 3196.924   | 3496.1998  | C4H6O6      | 2,3-Dihydroxybutanedioic acid                                                       | Organic acid And Its derivatives    | Organic acid And Its derivatives    | 149.0088 | 150.0688 | 4.3728   | M-H        | 2.29414989 | MSI       | 0.7605 | rp     | 133-37.9   | 85      | HMDB0093167 | -          | C02650 | --                                                       | -- | -- | -- | -- | -- | -- | -- | -- |    |    |
| MW0114231 | 604.31185  | 5627.8087  | 5286.25599 | 634.07733  | 5263.51038 | 5199.44004 | 5021.8122   | 4946.83152 | 4836.17649 | 5389.98704 | 4606.3131  | 4835.59805 | 4736.45413 | 4738.30614 | 4615.7053  | C3H7O7P     | 2-Phosphoglyceric acid                                                              | Organic acid And Its derivatives    | Organic acid And Its derivatives    | 186.9995 | 185.9929 | 12.134   | M-H        | 7.34925    | MSI       | 0.8462 | rp     | 600-18.0   | 59      | HMDB002005  | -          | C00109 | ko00260.ko00270.ko00290.ko00640.ko01100.ko041720.ko01230 | -- | -- | -- | -- | -- | -- | -- | -- | -- |    |
| MW0114273 | 151678.317 | 145356.111 | 13682.174  | 14582.979  | 113669.979 | 121469.67  | 66465.611   | 117566.401 | 6005.36914 | 117566.401 | 6005.36914 | 117566.401 | 6005.36914 | 117566.401 | 6005.36914 | C11H19NO2   | 4-Amino-2-ethylamino-1,3-thiazol-5-yl-(4-chlorophenyl)methane                       | Aldehyde,Ketones,Esters             | Ketones                             | 217.0628 | 224.117  | 5.6089   | M-K+H2O    | 15.8131395 | MSI       | 0.6625 | rp     | 102-71.6   | 7638    | HMDB006202  | -          | C01412 | ko00564.ko01100.ko05231                                  | -- | -- | -- | -- | -- | -- | -- | -- |    |    |
| MW0114861 | 82078.812  | 67211.666  | 72183.268  | 56741.9344 | 66583.9365 | 67151.3754 | 67231.8108  | 64401.545  | 71180.285  | 68057.6496 | 37228.7376 | 70597.3412 | 75138.3148 | 70378.5173 | 69905.5519 | C8H16O6     | 2-(2S,3R,4R,5R,2',3',4',5',6'-Pentahydroxyhexan-3-yl)-2,3,4,5,6-Pentahydroxyhexanol | Organic acid And Its derivatives    | Organic acid And Its derivatives    | 217.0028 | 180.0634 | 3.3762   | M-K+H2     | 18.5108994 | MSI       | 0.7915 | rp     | 3458-24.8  | 161658  | HMDB0062473 | -          | -      | -                                                        | -  | -  | -  | -  | -  | -  | -  | -  |    |    |
| MW0114874 | 170355.74  | 200931.495 | 2051.4226  | 195644.226 | 21602.212  | 255343.493 | 194336.371  | 253823.119 | 235823.119 | 235823.119 | 235823.119 | 235823.119 | 235823.119 | 235823.119 | 235823.119 | C5H10O6     | 3-Hydroxybenzaldehyde                                                               | Organic acid And Its derivatives    | Organic acid And Its derivatives    | 165.0411 | 166.4477 | 4.3728   | M-H        | 4.83440168 | MSI       | 0.7057 | rp     | 32609-14.6 | 122045  | HMDB0060339 | -          | C00878 | ko00053                                                  | -- | -- | -- | -- | -- | -- | -- | -- | -- |    |
| MW0114885 | 45075.4537 | 43655.1072 | 4219.8909  | 4100.6445  | 44888.0881 | 42000.5795 | 441301.4048 | 42648.6051 | 44473.1727 | 42332.3172 | 42941.4831 | 42044.9961 | 4251.7795  | 41930.809  | 42512.4233 | C4H10O3     | Diethylene glycol                                                                   | Alcohol and amines                  | Alcohols                            | 217.0707 | 106.063  | 4.4486   | M-H        | 3.3803938  | MSI       | 0.9278 | rp     | 111-46.6   | 8117    | -           | -          | -      | -                                                        | -  | -  | -  | -  | -  | -  | -  |    |    |    |
| MW0114253 | 126125.385 | 66877.8099 | 117.026183 | 149897.673 | 111274.458 | 142129.244 | 22874.575   | 154448.933 | 183729.237 | 200480.113 | 134360.808 | 19466.525  | C6H12O6    | D          |            |             |                                                                                     |                                     |                                     |          |          |          |            |            |           |        |        |            |         |             |            |        |                                                          |    |    |    |    |    |    |    |    |    |    |
